# Supplementary material
Source: Research Square preprint supplement (doi:10.21203/rs.3.rs-8966677/v1)
Supplement: Supplementary file 1 [file 6bae196f6e8106f3cfdd01f2.docx]

**Supplementary Information**

This Supporting Information provides additional characterization data (NMR, morphology, TEM/SAED, DSC/TGA) supporting the main manuscript.

**Figures**

**Fig. S1** 1H NMR spectrum of 4-acetamidobenzoic acid (4-ABA) confirming product formation and showing residual acetic acid (~1%) from recrystallization solvent.

**Fig. S2** Comparative morphology of poly(p-benzamide) (PBA) whiskers synthesized from petroleum-derived monomers under identical conditions, observed by polarized optical microscopy (POM)


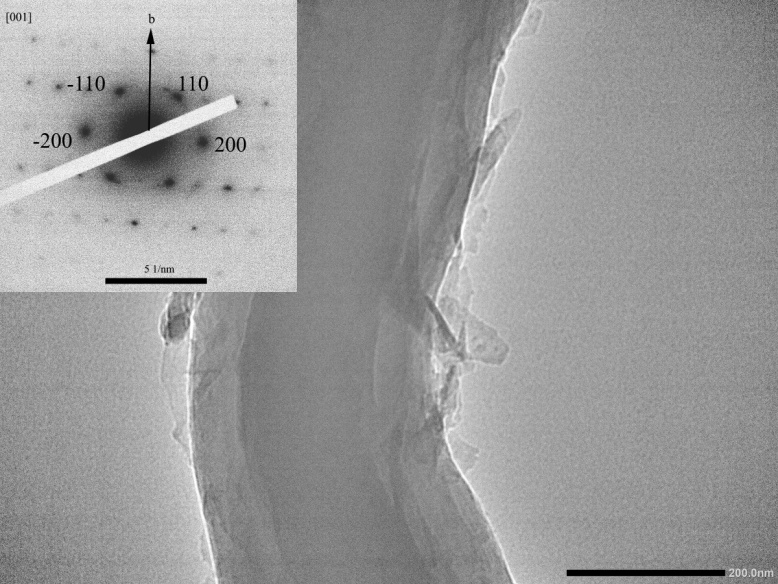


**Fig. S3** Crystallographic orientation of bio-derived PBA whiskers revealed by transmission electron microscopy (TEM) and selected-area electron diffraction (SAED).　The inset shows a Bright-field TEM image of a PBA whisker and its corresponding electron diffraction pattern oriented along [001] zone axis. Some of the main diffraction spots of the monoclinic lattice have been indexed. The arrow indicates crystal fiber growth along the *b*-axis.

**Fig. S4** Differential scanning calorimetry (DSC) and thermogravimetric analysis (TGA) profiles of PBA whiskers synthesized from petroleum-derived monomers, indicating thermal stability up to 400 °C.
